# Supplementary material for: Nonlinear temporal dynamics of cerebral small vessel disease: The RUN DMC study
Source: PubMed Central journal article supplement (PMC5634663; doi:10.1212/wnl.0000000000004490), 2017-10-10
Supplement: supp_WNL.0000000000004490_Supplemental_data.pdf [file supp_WNL.0000000000004490_Supplemental_data.pdf]

## Supplemental data

Figure e-1: Flowchart

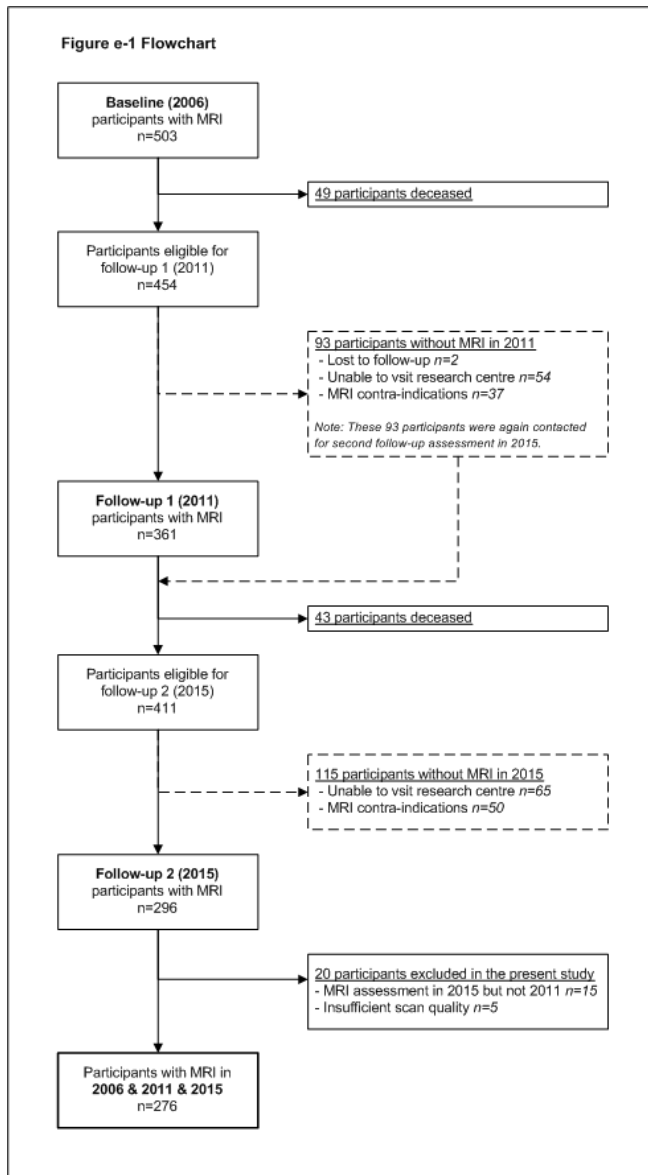

Design of the RUN DMC study. Imaging assessments were performed at three time-points over the course of nine years at baseline in 2006, at first follow-up in 2011 and at second follow-up in 2015. Note that the 93 participants who were unable to undergo first follow-up assessment in 2011 were again contacted for second follow-up assessment in 2015 (dotted lines). In total 281 participants underwent imaging assessments at all three time-points, of whom 276 participants were included in the present study.

**Figure e-2: Probability maps of white matter hyperintensities and lacunes**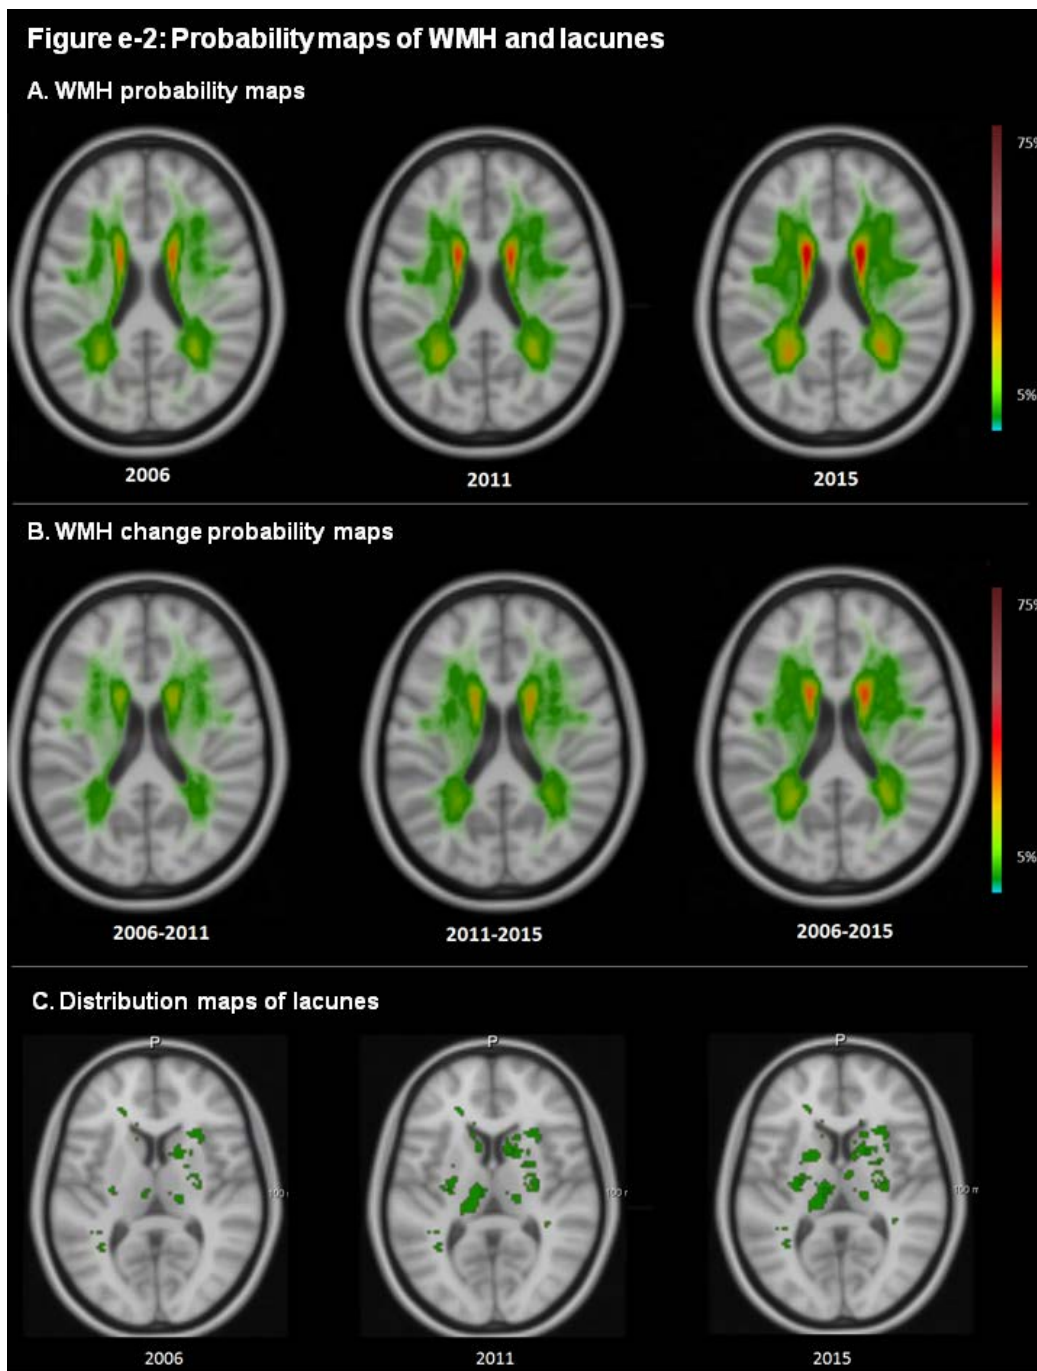

Probabilities of presence of WMH at three time-points (A) and probabilities to increase over these three time-points (B), colour-coded in percentage from 5 to 75%. Probability maps through the whole brain can be seen in **Video 1**. Panel C shows the distribution of lacunes at three time-points. Whole brain distribution maps can be seen in **Video 2**.

**Table e-1: Baseline characteristics of participants compared with those lost to follow-up**

|                                                 | Participants<br>n=276 | Lost to follow up<br>n=227 | significance      |
|-------------------------------------------------|-----------------------|----------------------------|-------------------|
| <b>Demographics</b>                             |                       |                            |                   |
| Age (years), mean (SD)                          | 62.5 (7.7)            | 69.5 (8.5)                 | <b>p&lt;0.001</b> |
| Sex, male, no (%)                               | 163 (59.1)            | 121 (53.3)                 | p=0.207           |
| Education >primary school, no (%)               | 259 (93.8)            | 32 (14.1)                  | <b>p=0.004</b>    |
| MMSE score, mean (SD)                           | 28.6 (1.3)            | 27.6 (1.8)                 | <b>p&lt;0.001</b> |
| <b>SVD Characteristics</b>                      |                       |                            |                   |
| White matter hyperintensities, ml, median (IQR) | 2.3 (0.8-6.1)         | 7.7 (2.6-16.2)             | <b>p&lt;0.001</b> |
| White matter hyperintensities, ml, Mean (SD)    | 5.8 (9.5)             | 11.9 (13.6)                | <b>p&lt;0.001</b> |
| % WMH of WM, mean (SD)                          | 1.3 (2.3)             | 2.9 (4.4)                  | <b>p&lt;0.001</b> |
| Participants with any lacunes, n (%)            | 55 (19.9)             | 77 (33.9)                  | <b>p&lt;0.001</b> |
| Total number of lacunes                         | 117                   | 135                        | <b>p=0.038</b>    |
| Participants with any microbleeds, n (%) °      | 36 (13.1)             | 47 (20.9)                  | <b>p=0.022</b>    |
| Total number of microbleeds °                   | 140                   | 159                        | p=0.496           |
| Territorial Infarcts, n (%)                     | 23 (8.3)              | 34 (15.0)                  | <b>p=0.023</b>    |
| <b>Modified Fazekas score</b>                   |                       |                            |                   |
| Mild WMH (0-1), no (%)                          | 218 (79.0)            | 114 (50.2)                 | <b>p&lt;0.001</b> |
| Moderate WMH (2), no (%)                        | 38 (13.8)             | 70 (30.8)                  | <b>p&lt;0.001</b> |
| Severe WMH (3), no (%)                          | 20 (7.2)              | 43 (18.9)                  | <b>p&lt;0.001</b> |
| <b>Brain volumes</b>                            |                       |                            |                   |
| White matter volume, ml (SD)                    | 465.6 (38.9)          | 441.5 (50.2)               | <b>p&lt;0.001</b> |
| Grey matter volume, ml (SD)                     | 620.7 (48.9)          | 588.7 (51.6)               | <b>p&lt;0.001</b> |
| <b>Vascular risk factors</b>                    |                       |                            |                   |
| Smoking, ever, no (%)                           | 196 (71.0)            | 157 (69.2)                 | p=0.696           |
| Alcohol, glasses/week, mean (SD)                | 8.3 (9.0)             | 7.5 (9.7)                  | p=0.367           |
| Glucose lowering drugs, no (%)                  | 23 (8.3)              | 43 (18.9)                  | <b>p=0.001</b>    |
| Hypertension, no (%)                            | 190 (68.8)            | 179 (78.9)                 | <b>p=0.015</b>    |
| BMI, mean (SD)                                  | 27.1 (4.1)            | 27.2 (4.2)                 | p=0.778           |
| Lipid-lowering drugs, no (%)                    | 118 (42.8)            | 119 (52.4)                 | <b>p=0.032</b>    |

**Table e-1: Baseline characteristics of participants compared with those lost to follow-up**

Data are represented as numbers (%), mean (SD) or median (IQR). Comparisons between participants and those lost to follow-up were performed by t-test, Chi-square or Mann-Whitney-U test.

°For ratings of microbleeds 4 participants were additional excluded based on missing T2\*or scanartefacts at baseline.

**Table e-2: Correlation matrix for baseline SVD characteristics and SVD progression**

|                             | Age              | Sex             | Baseline WMH volume | Baseline lacunes | Baseline microbleeds | Baseline WM volume | Baseline GM volume | Change WMH volume | Incident lacunes | Incident microbleeds | Change WM volume | Change GM volume |
|-----------------------------|------------------|-----------------|---------------------|------------------|----------------------|--------------------|--------------------|-------------------|------------------|----------------------|------------------|------------------|
| <b>Age</b>                  | ...              | ...             | ...                 | ...              | ...                  | ...                | ...                | ...               | ...              | ...                  | ...              | ...              |
| <b>Sex</b>                  | -0.010           | ...             | ...                 | ...              | ...                  | ...                | ...                | ...               | ...              | ...                  | ...              | ...              |
| <b>Baseline WMH volume</b>  | <b>0.315***</b>  | 0.088           | ...                 | ...              | ...                  | ...                | ...                | ...               | ...              | ...                  | ...              | ...              |
| <b>Baseline lacunes</b>     | <b>0.189**</b>   | -0.102          | <b>0.310***</b>     | ...              | ...                  | ...                | ...                | ...               | ...              | ...                  | ...              | ...              |
| <b>Baseline microbleeds</b> | <b>0.127*</b>    | 0.006           | <b>0.222***</b>     | <b>0.237***</b>  | ...                  | ...                | ...                | ...               | ...              | ...                  | ...              | ...              |
| <b>Baseline WM volume</b>   | <b>-0.460***</b> | 0.001           | <b>-0.244***</b>    | <b>-0.205**</b>  | <b>-0.132*</b>       | ...                | ...                | ...               | ...              | ...                  | ...              | ...              |
| <b>Baseline GM volume</b>   | <b>-0.531***</b> | <b>0.354***</b> | <b>-0.258***</b>    | <b>-0.265***</b> | <b>-0.161**</b>      | <b>0.283***</b>    | ...                | ...               | ...              | ...                  | ...              | ...              |
| <b>Change WMH volume</b>    | <b>0.299***</b>  | 0.101           | <b>0.577***</b>     | <b>0.229***</b>  | 0.110                | <b>-0.182**</b>    | <b>-0.281***</b>   | ...               | ...              | ...                  | ...              | ...              |
| <b>Incident lacunes</b>     | <b>0.137*</b>    | -0.054          | <b>0.299***</b>     | <b>0.447***</b>  | <b>0.129*</b>        | <b>-0.165**</b>    | <b>-0.151*</b>     | <b>0.207**</b>    | ...              | ...                  | ...              | ...              |
| <b>Incident microbleeds</b> | <b>0.226***</b>  | 0.049           | <b>0.256***</b>     | <b>0.153*</b>    | 0.101                | -0.104             | <b>-0.147*</b>     | <b>0.161**</b>    | <b>0.173**</b>   | ...                  | ...              | ...              |
| <b>Change WM volume</b>     | <b>-0.379***</b> | <b>0.164**</b>  | <b>-0.186**</b>     | <b>-0.166**</b>  | <b>-0.131*</b>       | <b>0.202**</b>     | <b>0.266***</b>    | <b>-0.295***</b>  | -0.085           | <b>-0.172**</b>      | ...              | ...              |
| <b>Change GM volume</b>     | <b>-0.131*</b>   | 0.038           | -0.036              | -0.109           | 0.026                | 0.046              | -0.093             | -0.051            | -0.112           | -0.115               | <b>0.189**</b>   | ...              |

**Table e-2: Correlation matrix for baseline SVD characteristics and SVD progression**

Correlations between baseline SVD characteristics and progression of SVD markers were determined by Spearman Rho for binary characteristics and by Pearson Correlation coefficients for continuous variables.

Correlations were significant at 2-tailed \* $p < 0.05$ ; \*\* $p < 0.01$ ; \*\*\* $p < 0.001$ .
